# Supplementary material
Source: PubMed Central journal article supplement (PMC9258769)

**A**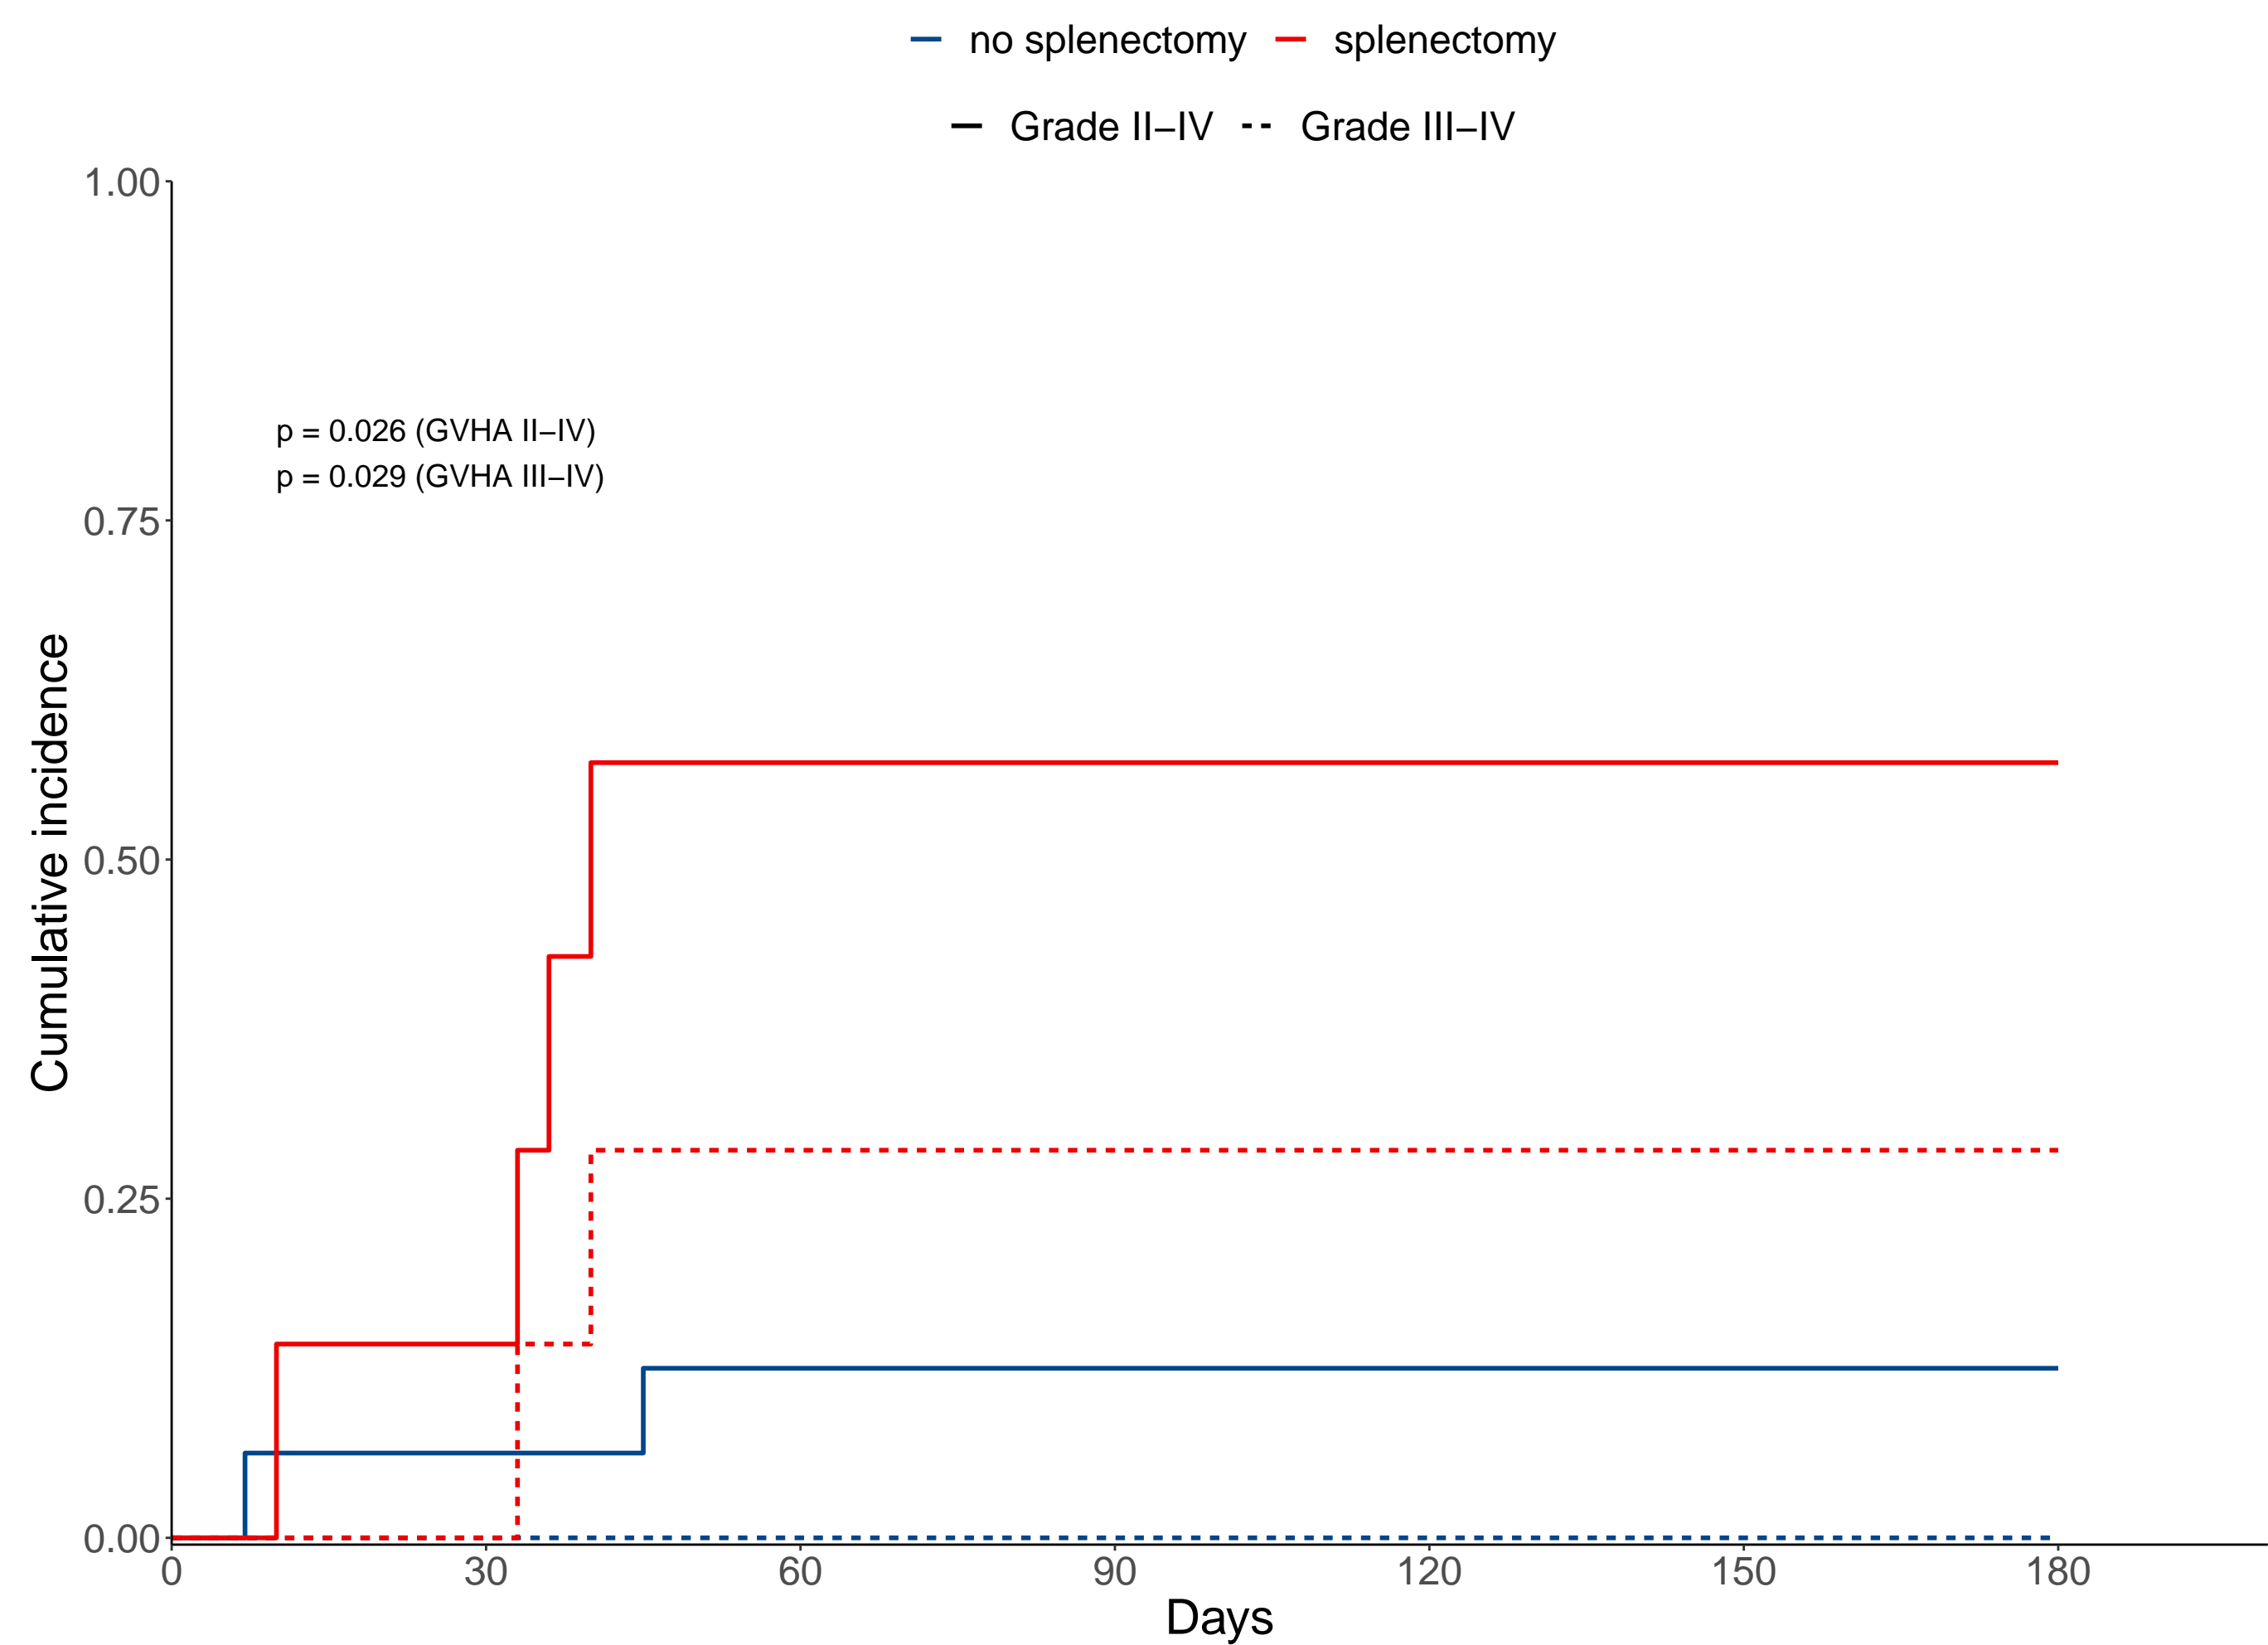**B**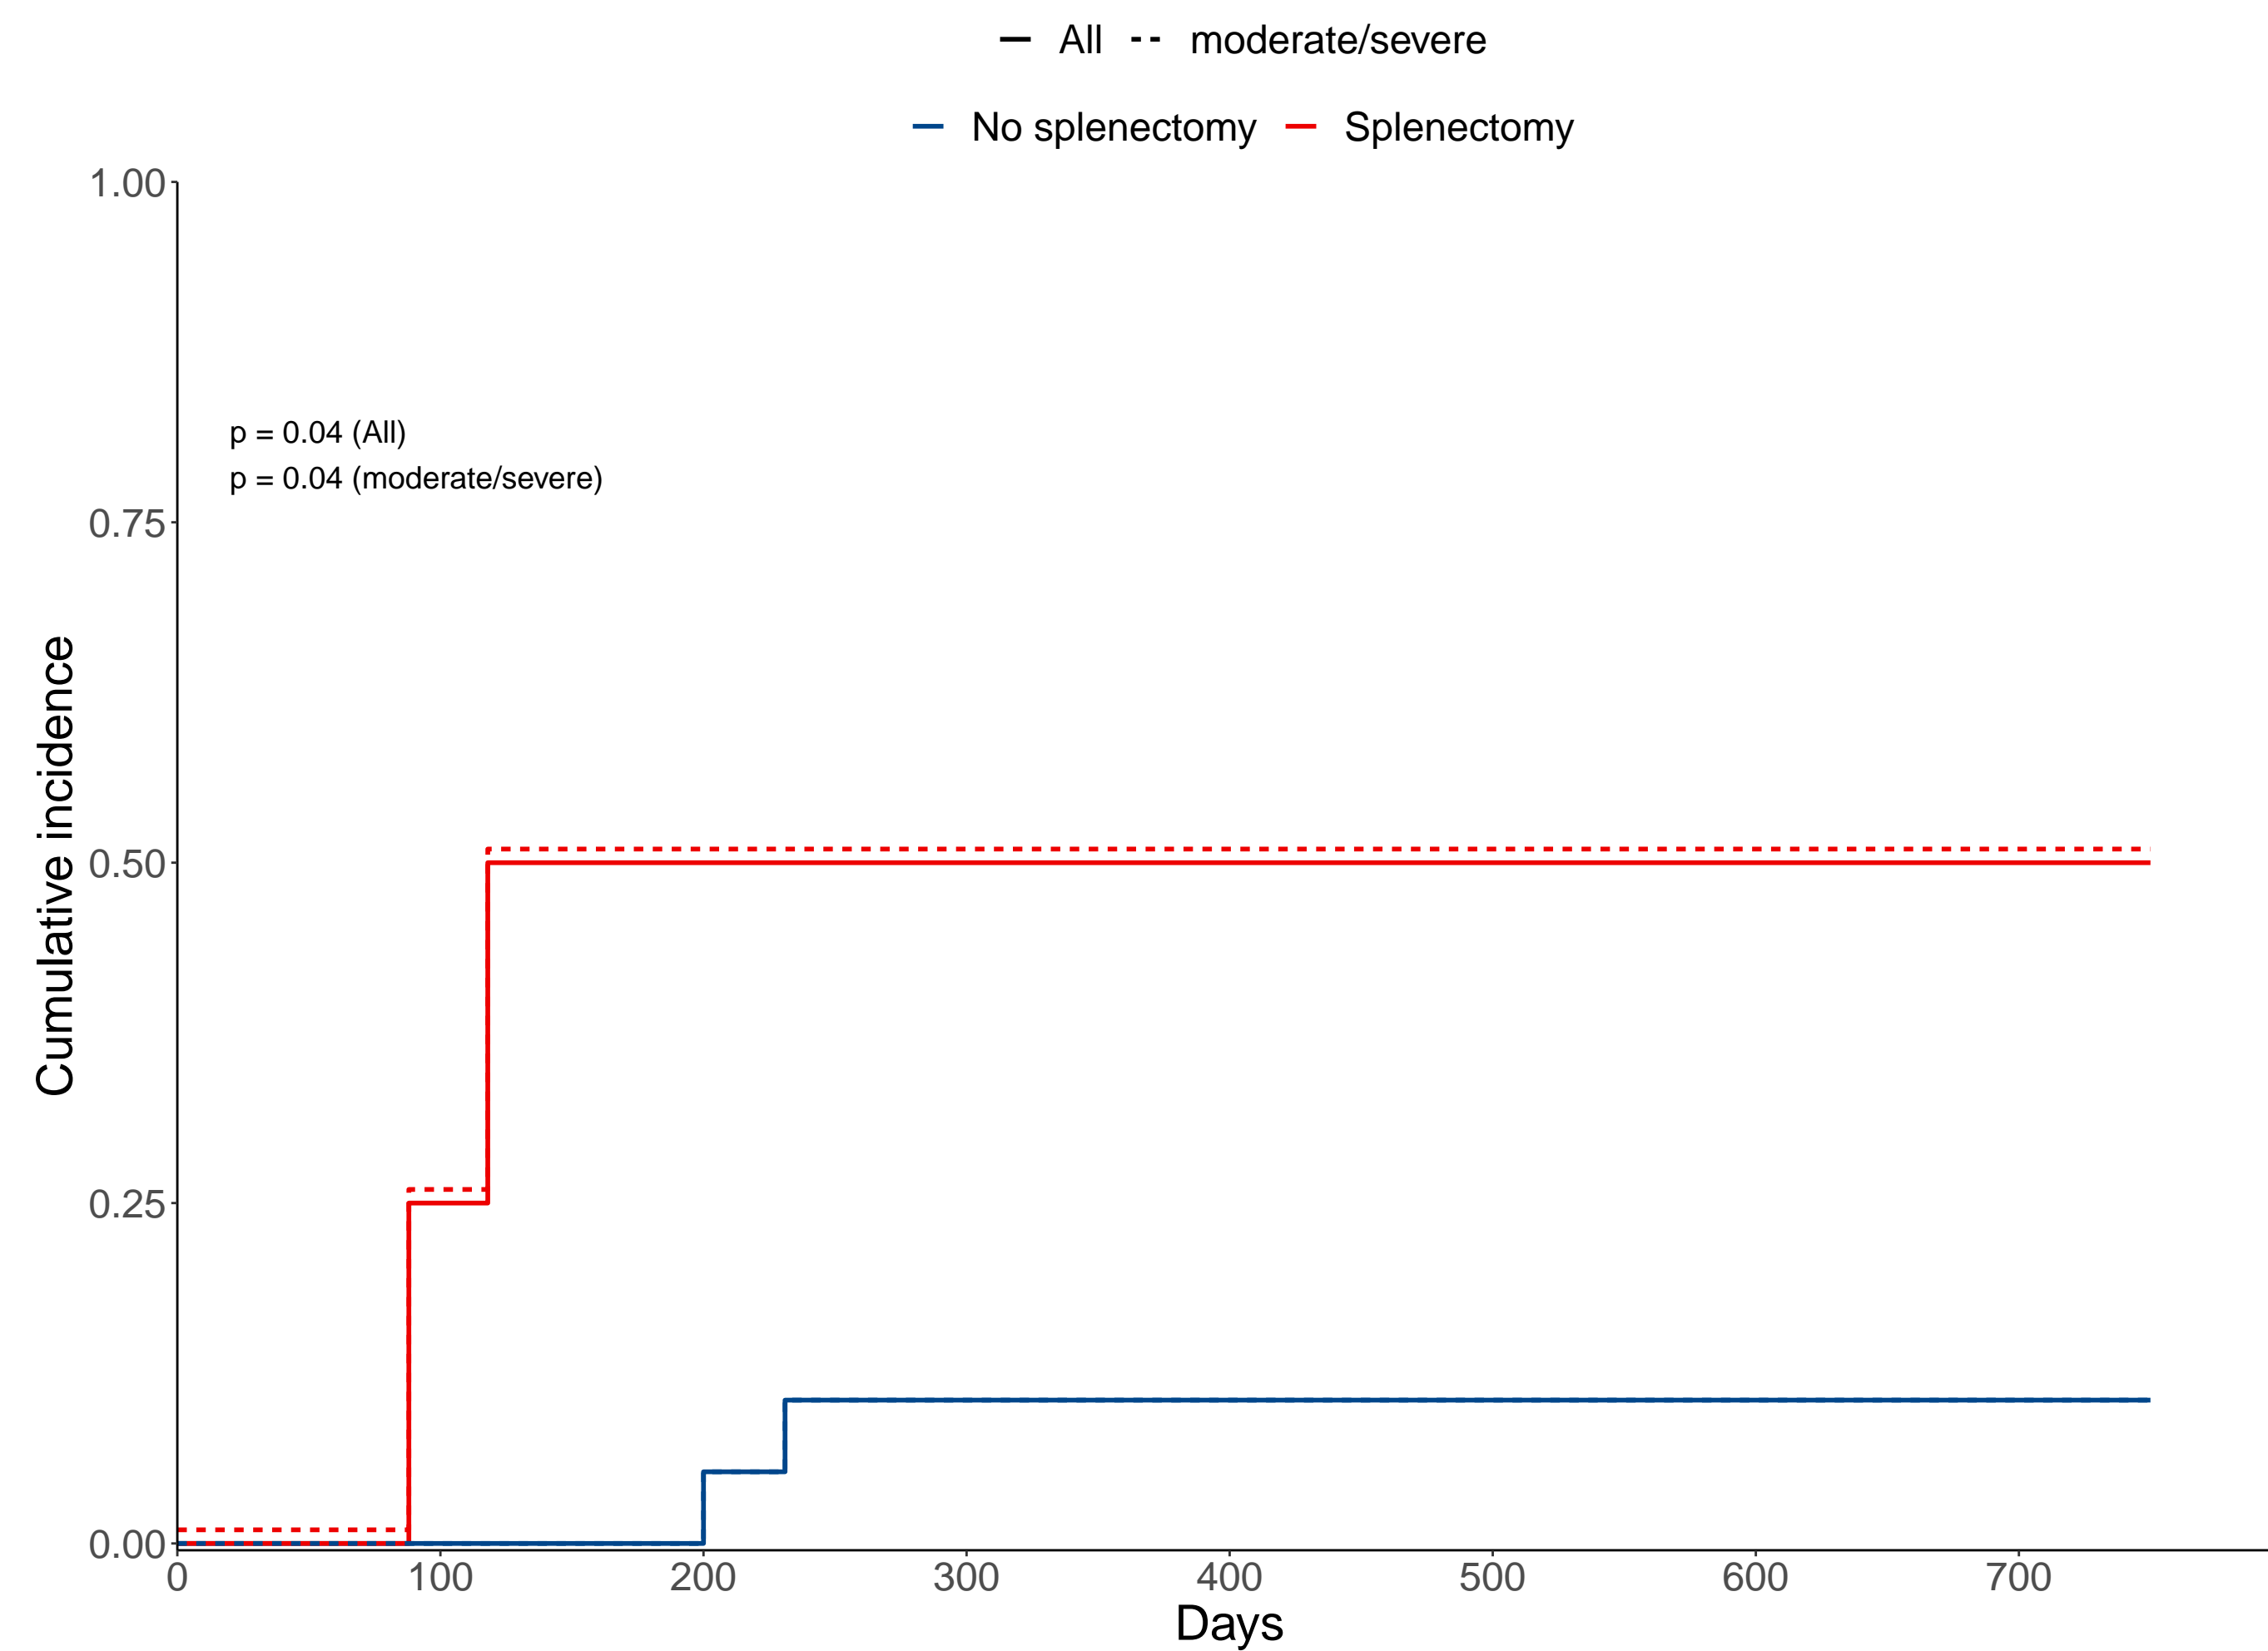**C**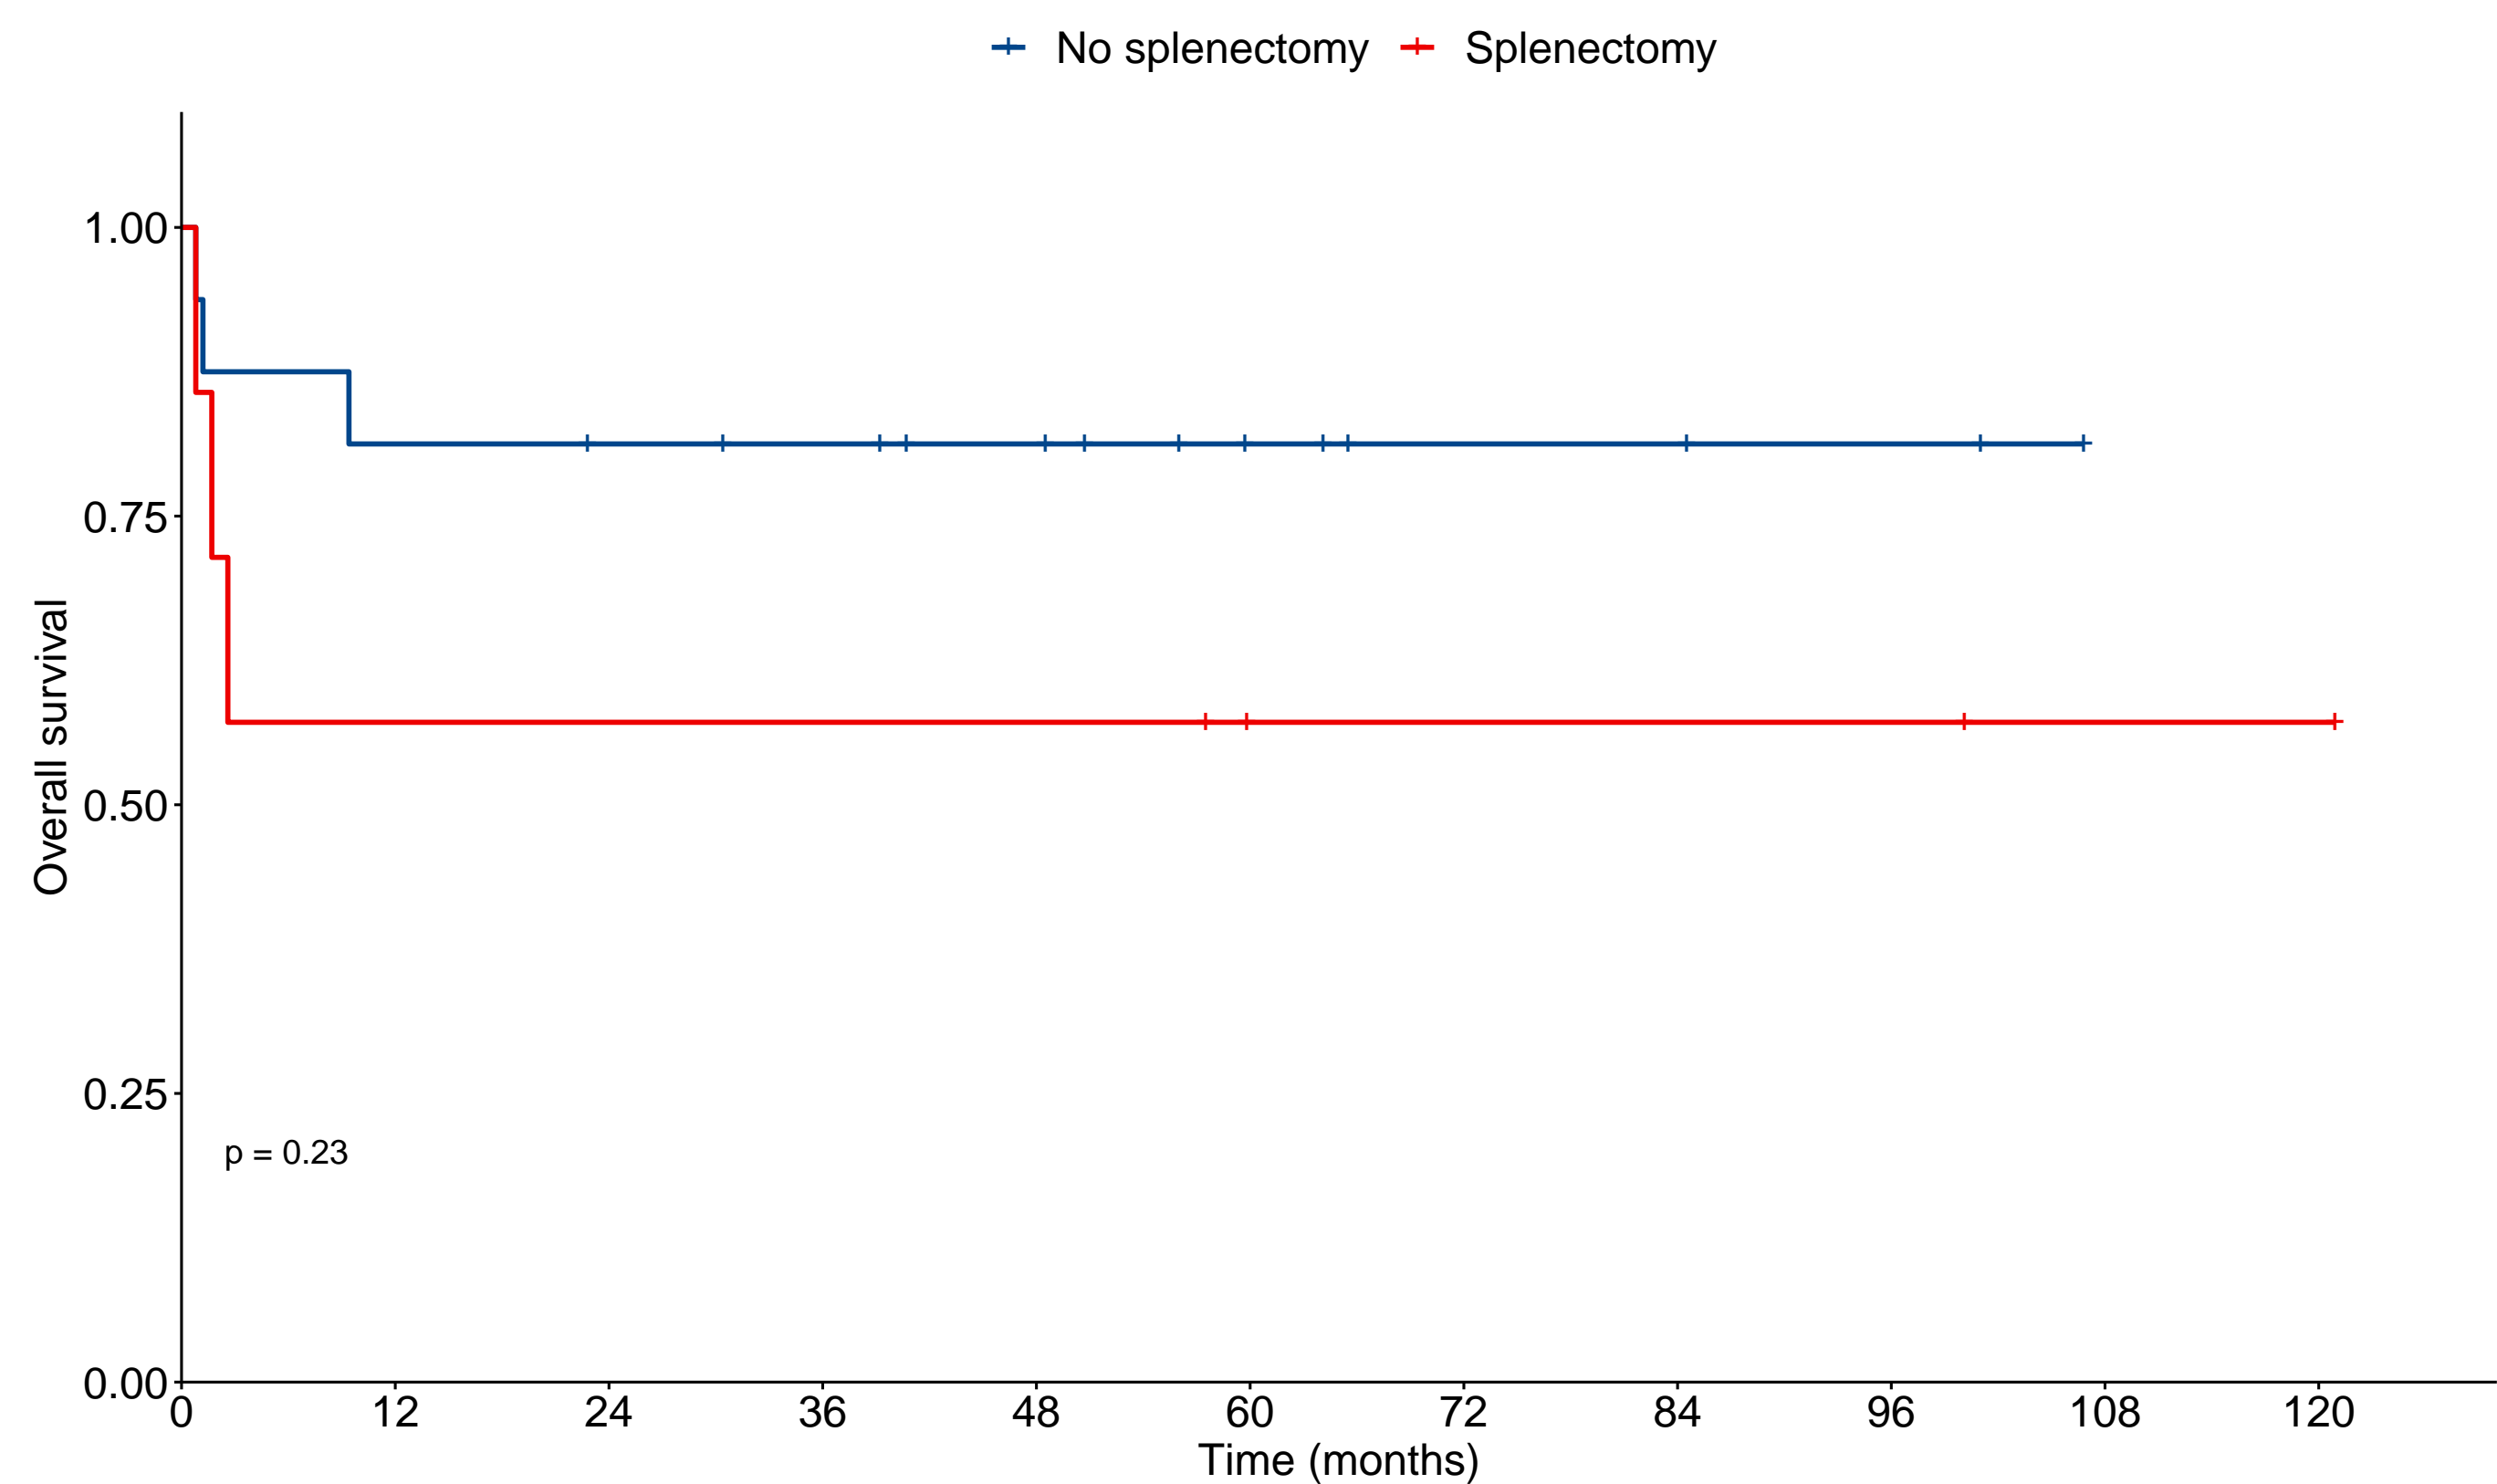

|   |    |    |    |    |   |   |   |   |   |   |   |
|---|----|----|----|----|---|---|---|---|---|---|---|
| — | 16 | 13 | 12 | 11 | 9 | 5 | 3 | 3 | 2 | 0 | 0 |
| — | 7  | 4  | 4  | 4  | 4 | 2 | 2 | 2 | 2 | 1 | 1 |

**D**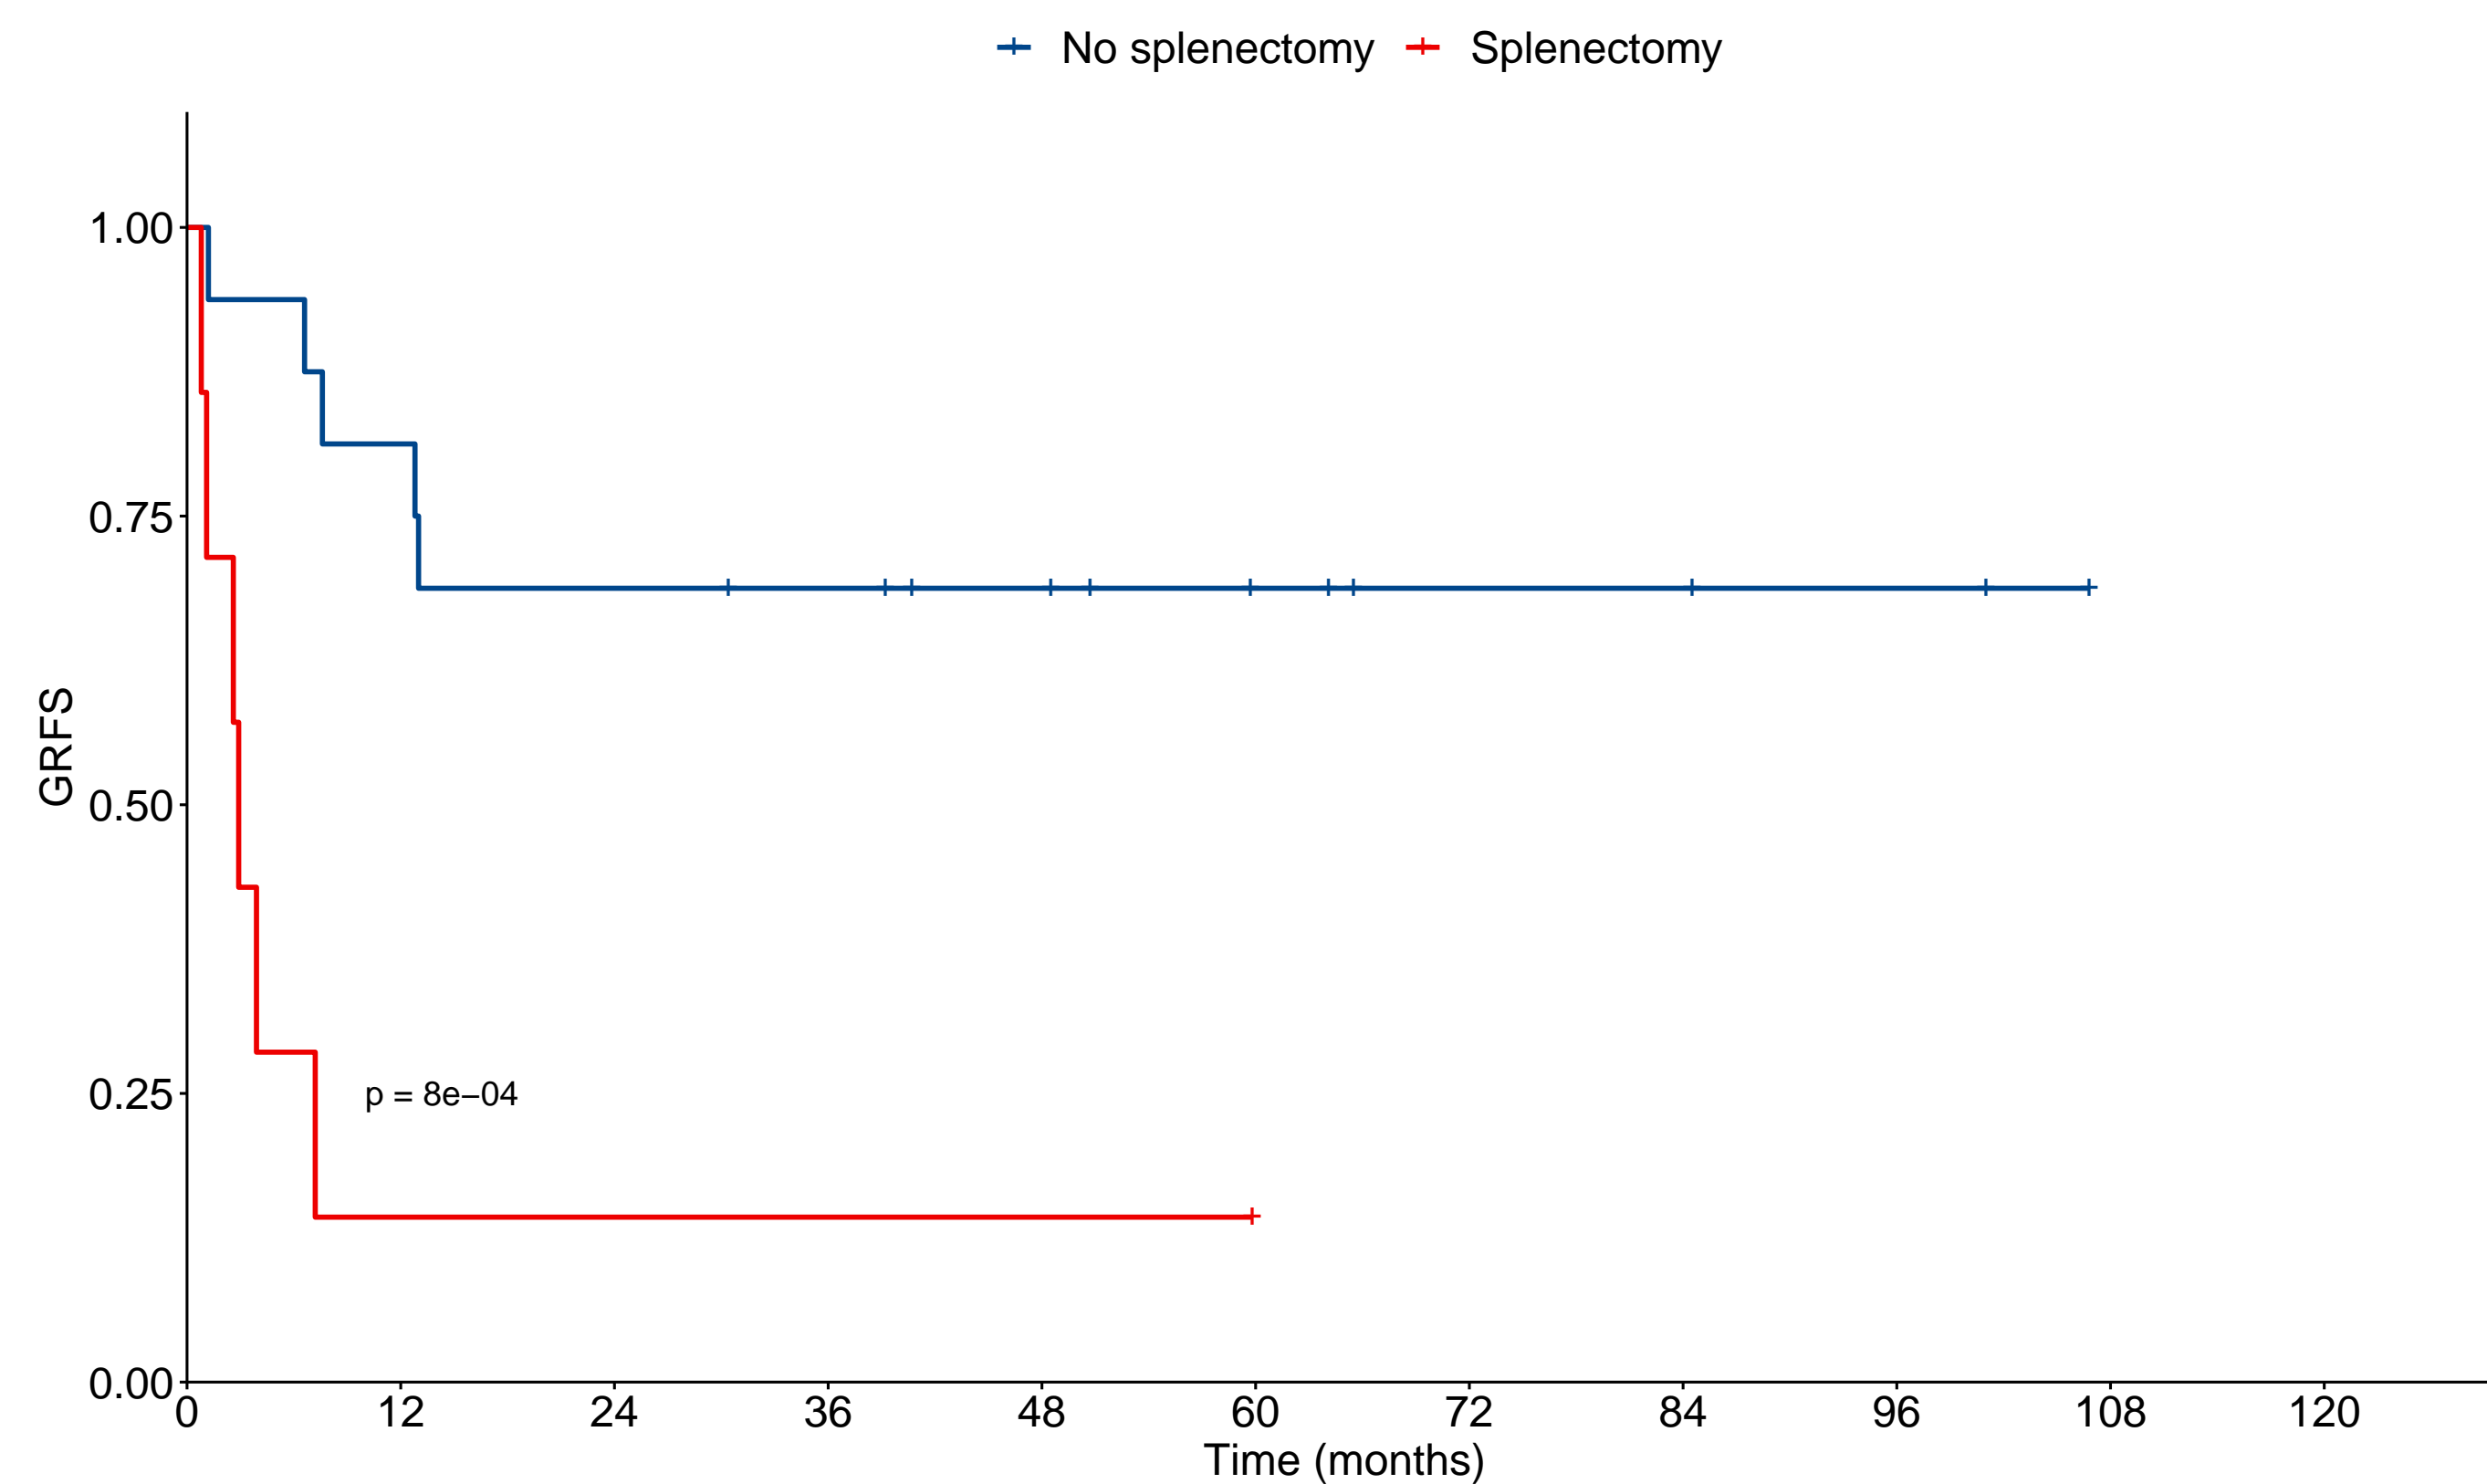

|   |    |    |    |    |   |   |   |   |   |   |   |
|---|----|----|----|----|---|---|---|---|---|---|---|
| — | 16 | 13 | 11 | 10 | 8 | 5 | 3 | 3 | 2 | 0 | 0 |
| — | 7  | 1  | 1  | 1  | 1 | 0 | 0 | 0 | 0 | 0 | 0 |

Supplement: 41409_2022_1739_MOESM1_ESM.pdf [file 41409_2022_1739_MOESM1_ESM.pdf]
